# Supplementary material for: Host genetic variation and its microbiome interactions within the Human Microbiome Project
Source: Springer Nature journal article supplement (doi:10.1186/s13073-018-0515-8), 2018-01-29
Supplement: 13073_2018_515_MOESM1_ESM.pdf [file 13073_2018_515_MOESM1_ESM.pdf]

## Supplemental Figure and Table legends

**Figure S1. Sequencing and variant call quality metrics.** **a** Percentage of contamination and chimeric reads. **b** Various metrics based on variant calling.

**Figure S2. Distribution of genic and intergenic variants.** Proportion of intronic, exonic and intergenic variants in HMP300, GoNL, and 1000 Genome cohorts.

**Figure S3. Combined PCA analysis between 1000 Genomes and HMP300.** Both panels correspond to the same underlying coordinate system defined by a PCA of a merger of common variants from 1000 Genomes and HMP300 datasets.

**Figure S4. Correlation between high-level genetic features and microbial species in non-gut body sites.** Same analysis as in Figure 2b, performed using other body sites.

**Figure S5. Correlation between high-level genetic features and microbial metabolic pathways in non-gut body sites.** Same analysis as in Figure 2c, performed using other body sites.

**Figure S6. Quantile-quantile plots for association analysis between microbial species and GWAS catalog SNVs.**

**Figure S7. Quantile-quantile plots for association analysis between microbial metabolic pathways and GWAS catalog SNVs.**

**Figure S8. Putative SNV–microbial species associations.** All associations between single nucleotide variants and microbial species with  $p < 5 \times 10^{-8}$  are shown, with color and size of the edges displaying sampling site and association strength respectively.

**Figure S9. Putative SNV–microbial metabolic pathway associations.** All associations between single nucleotide variants and microbial metabolic pathways with  $p < 5 \times 10^{-8}$  are shown, with color and size of the edges displaying sampling site and association strength respectively.

**Table S1. Raw statistics for genetic principal component analysis.** Sheet 1 contains statistics for average  $R^2$  calculations shown in Figure 2b. The additional 12 sheets provide statistics for individual species- and pathway-level analyses for all six body sites, corresponding to Figure 2c and Figures S4-S5.

**Table S2. Top SNV and microbiome association results.** Top associations ( $p < 10^{-6}$ ) are shown for both species and pathways in all six body sites.

Figure S1

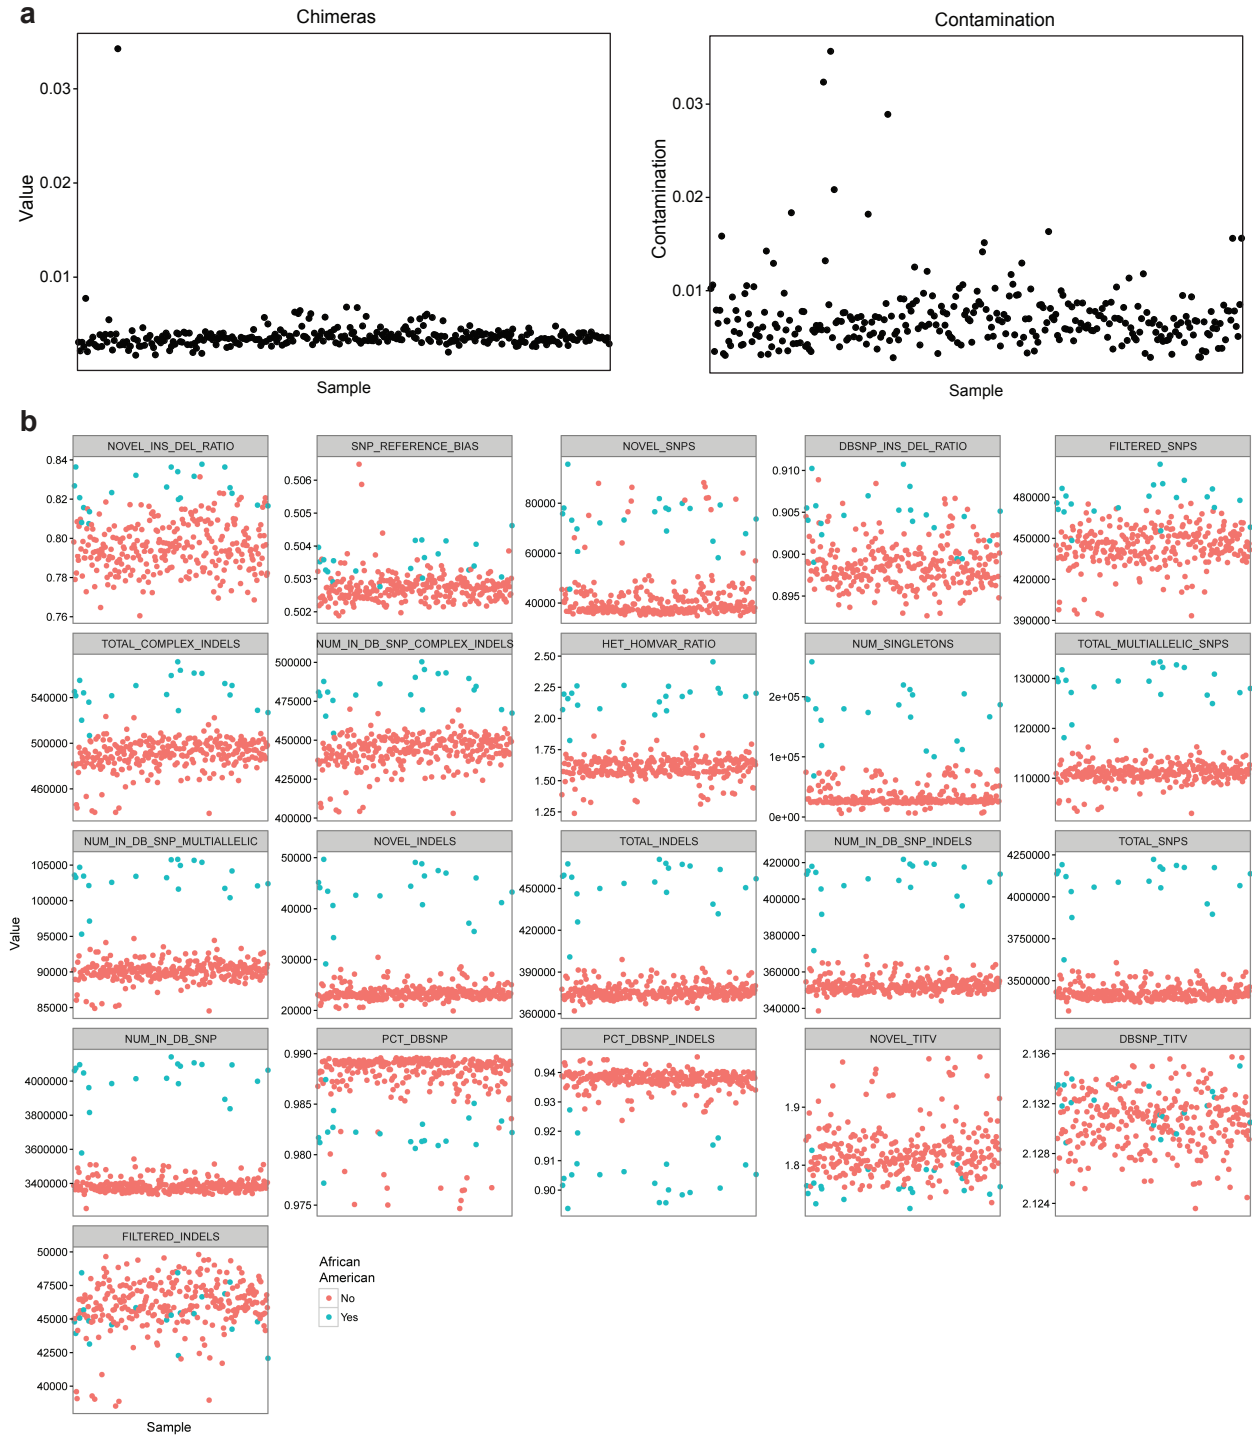

Figure S2

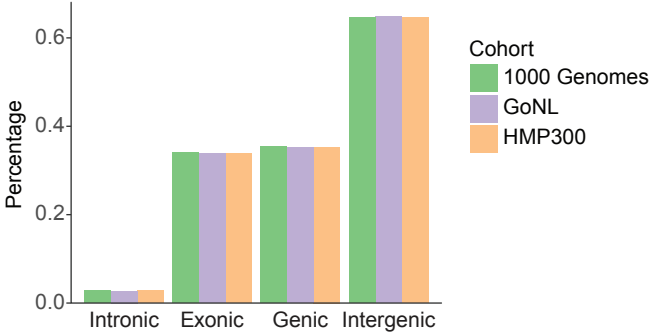

Figure S3

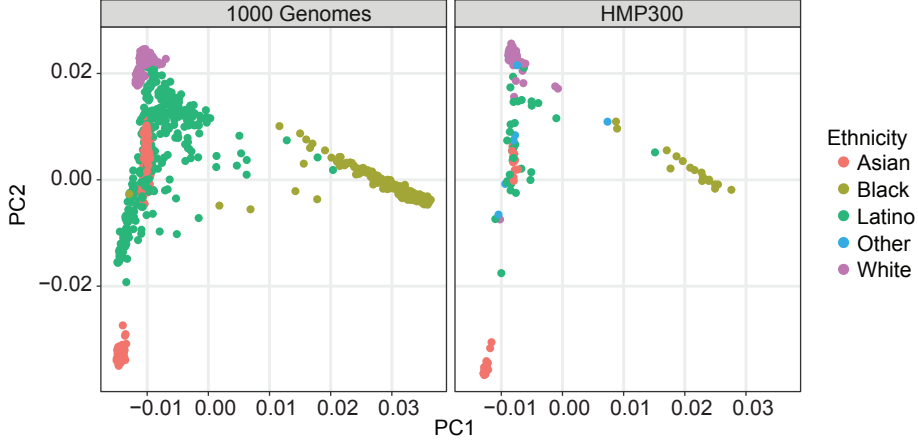

# Figure S4

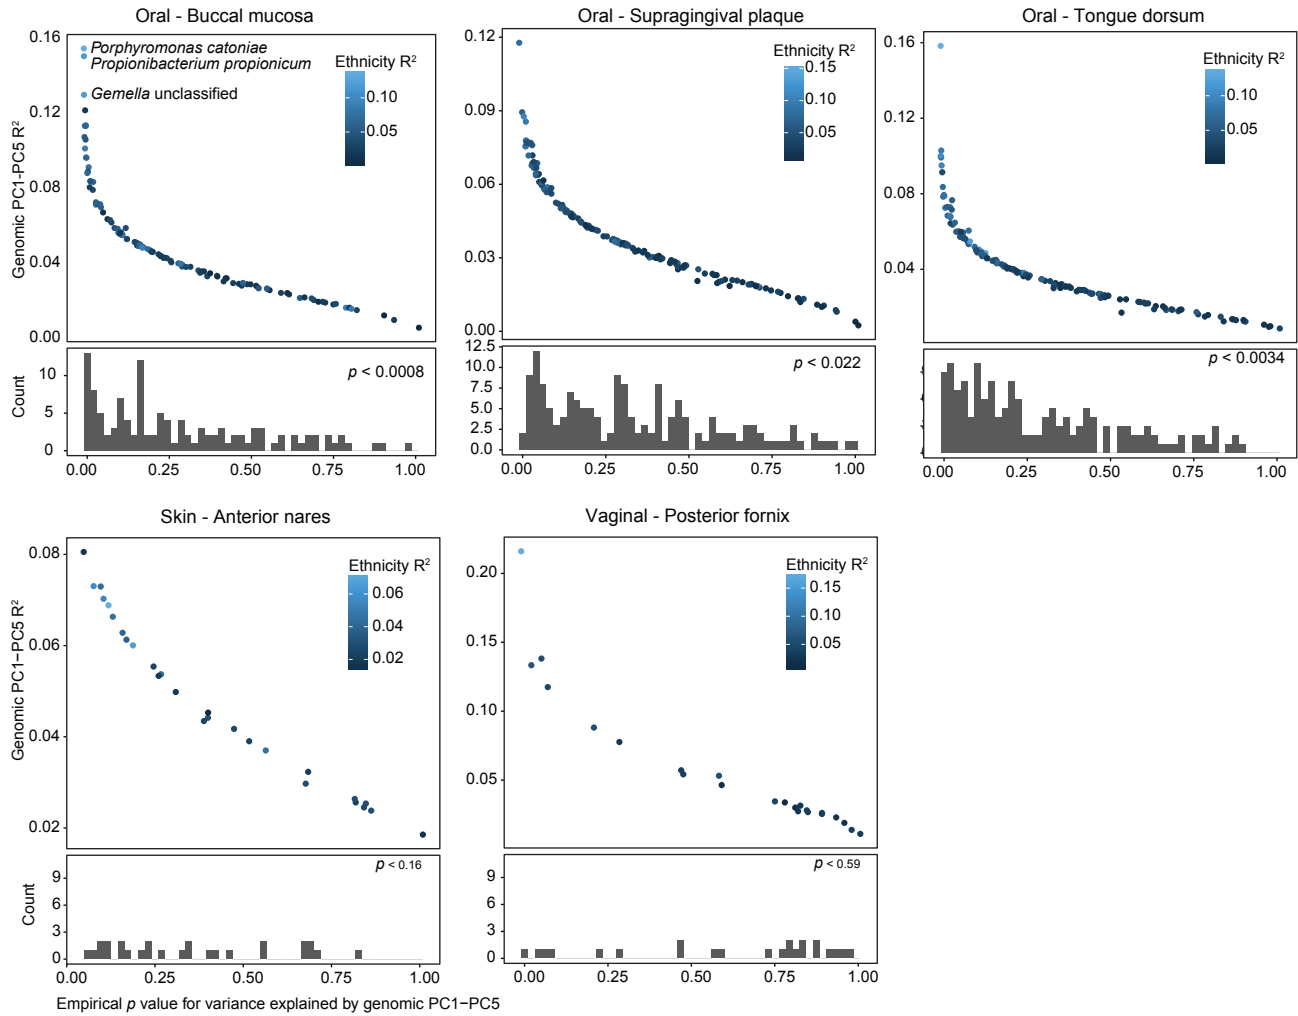

# Figure S5

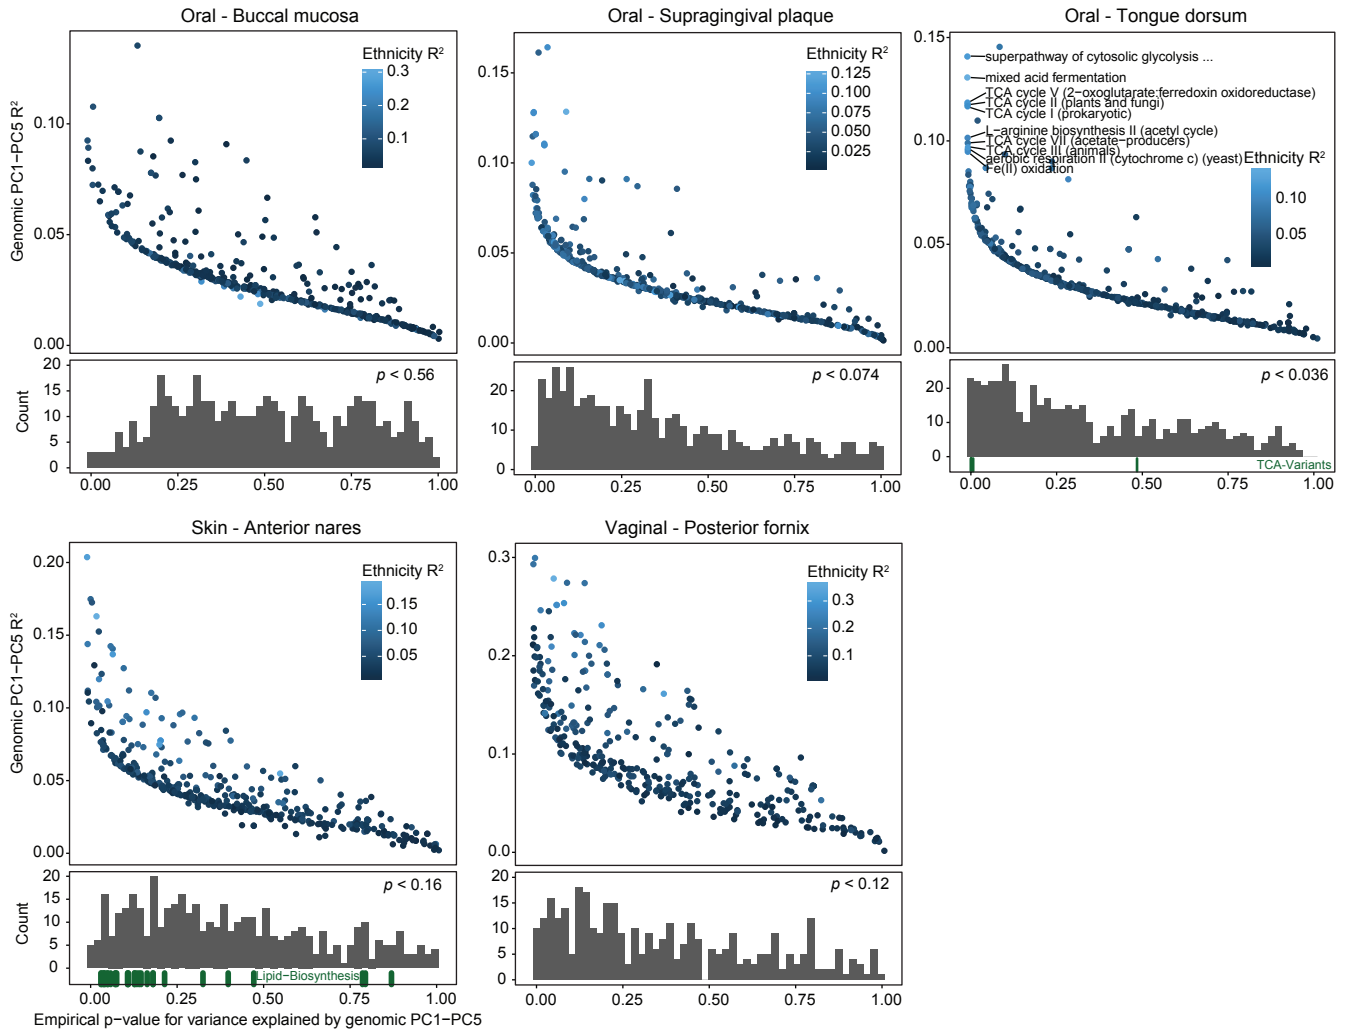

# Figure S6

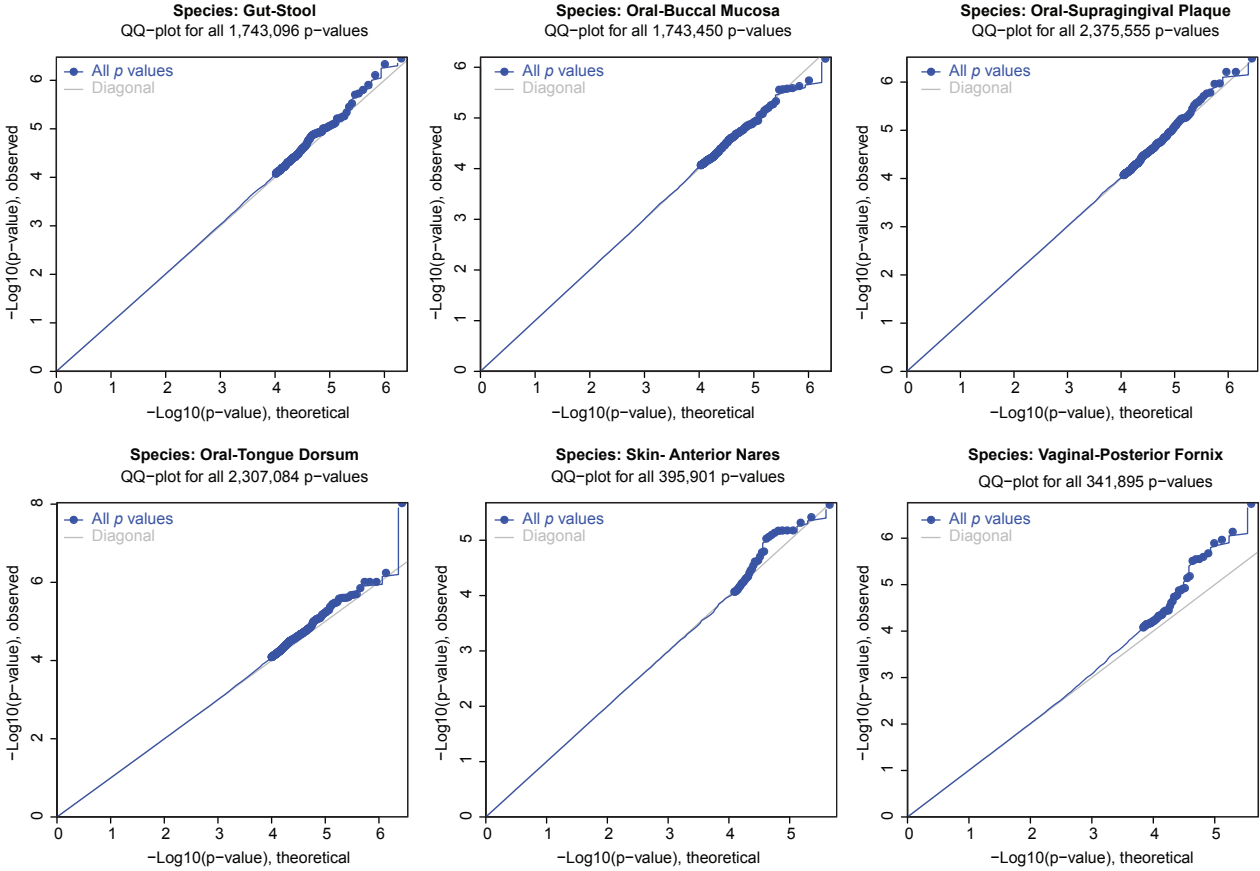



# Figure S7

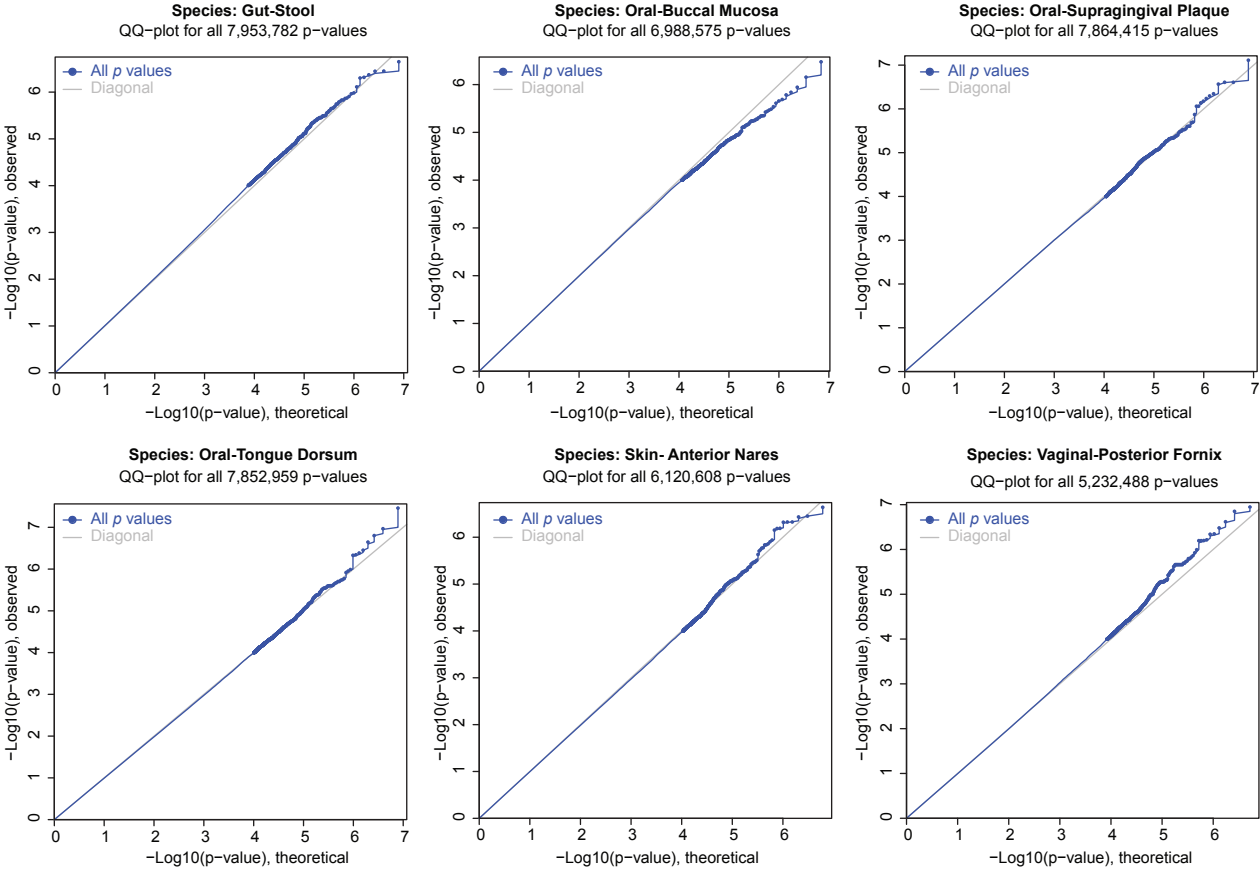

# Figure S8

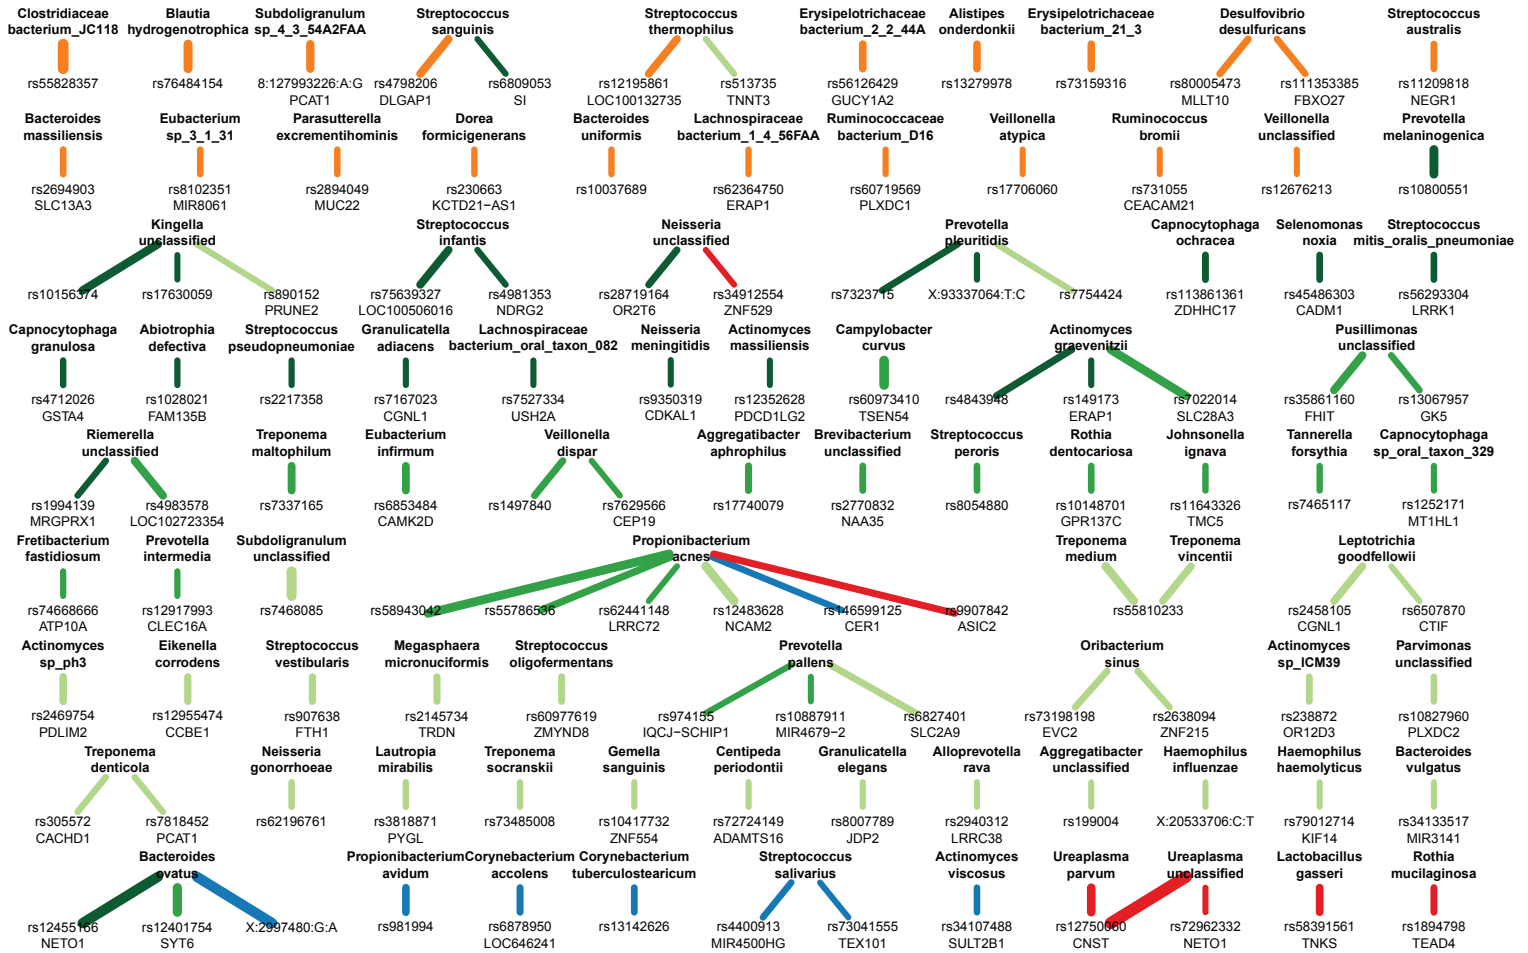

**Site**

- Orange: Gut - Stool
- Dark Green: Oral - Buccal mucosa
- Medium Green: Oral - Supraringival plaque
- Light Green: Oral - Tongue dorsum
- Blue: Skin - Anterior nares
- Red: Vaginal - Posterior fornix

**P-value**

- Thick line:  $10^{-11}$
- Thin line:  $10^{-8}$

# Figure S9

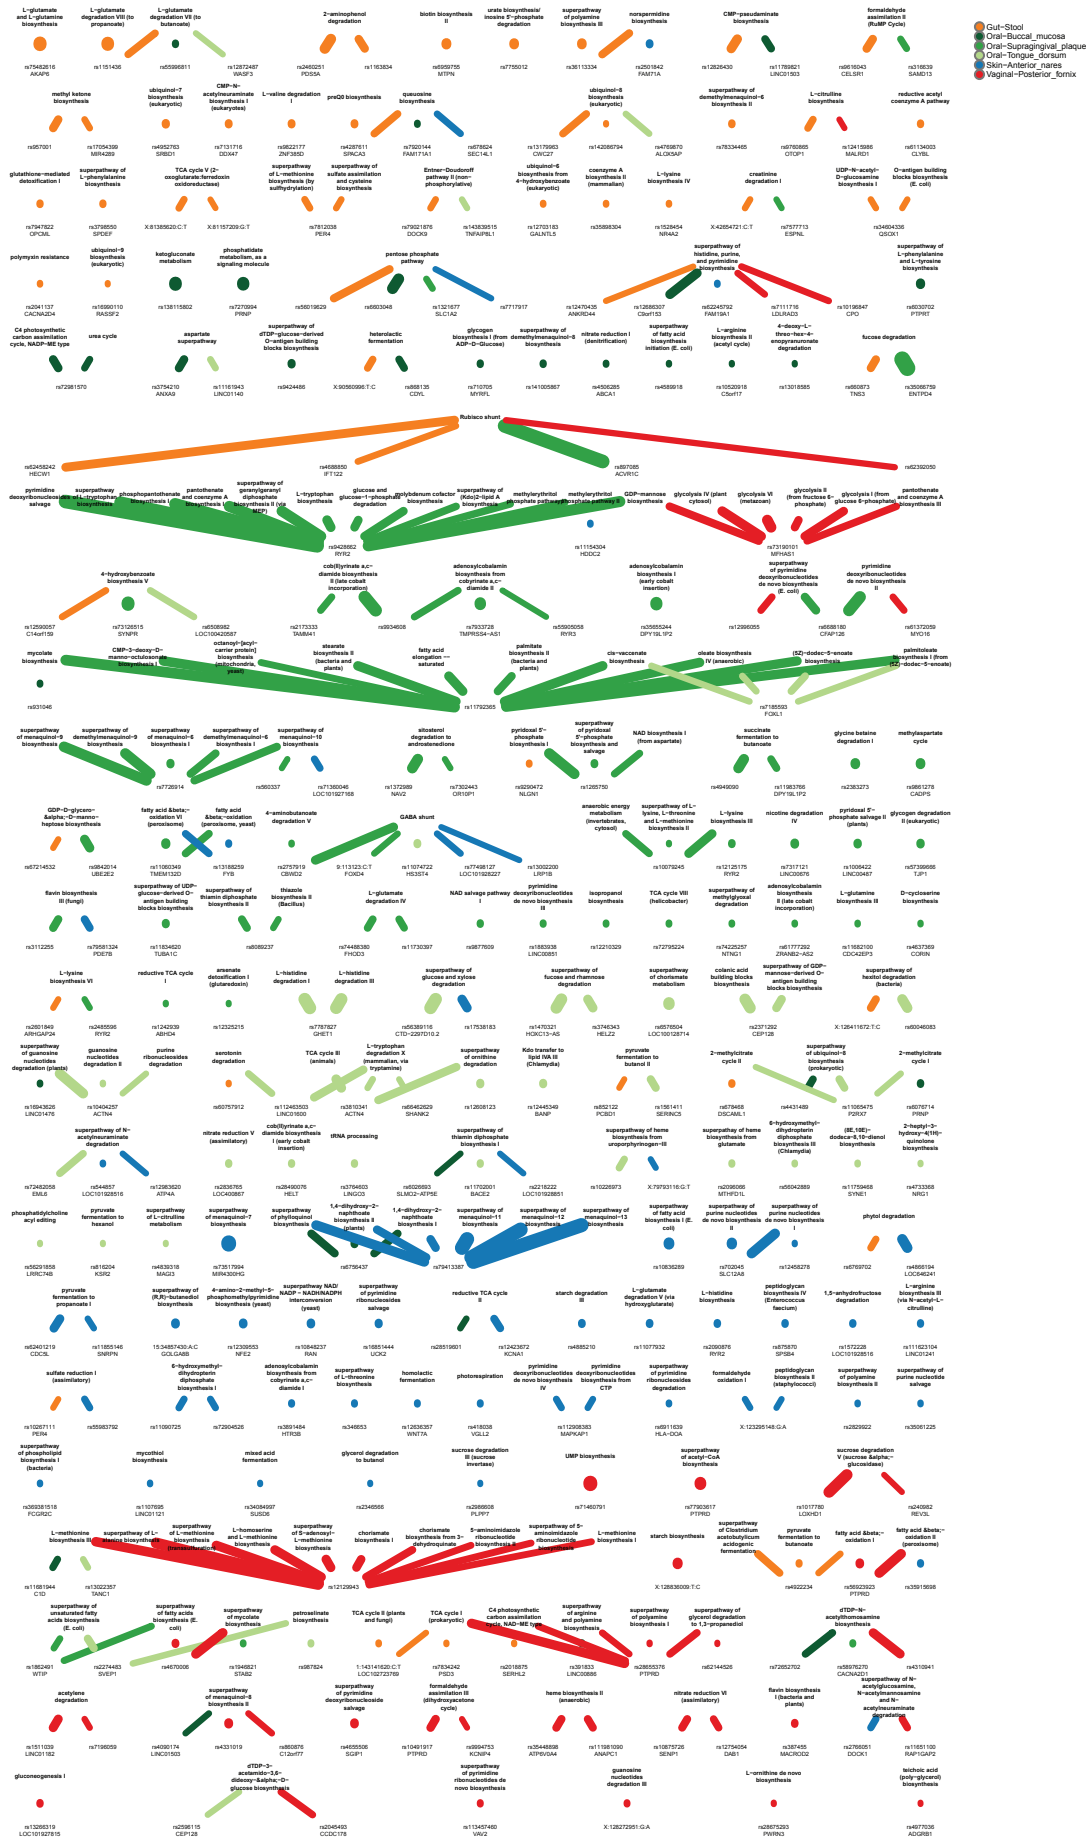

| <b>MAF</b>     | <b>Indel</b>            | <b>Multi-allelic</b>  | <b>SNV</b>                | <b>Summary</b>     |
|----------------|-------------------------|-----------------------|---------------------------|--------------------|
| AC1            | 974,836 (7.9%)          | 0 (0%)                | 11,375,702 (92.1%)        | 12,350,538 (41.7%) |
| AC2            | 258,462 (8.1%)          | 54,546 (1.7%)         | 2,870,739 (90.2%)         | 3,183,747 (10.7%)  |
| MAF < 1%       | 267,166 (8.1%)          | 74,313 (2.2%)         | 2,968,917 (89.7%)         | 3,310,396 (11.2%)  |
| 1% < MAF < 5%  | 299,227 (8.0%)          | 125,840 (3.4%)        | 3,297,232 (88.6 %)        | 3,722,299 (12.6%)  |
| MAF > 5%       | 547,164 (7.8%)          | 257,000 (3.6%)        | 6,250,382 (88.6%)         | 7,054,546 (23.6%)  |
| <b>Summary</b> | <b>2,346,855 (7.9%)</b> | <b>511,699 (1.7%)</b> | <b>26,762,972 (90.3%)</b> | <b>29,621,526</b>  |

**Table S1. Number of variants and minor allele frequency.**

| <b>Variation</b> | <b>MAF</b>    | <b>LoF</b> | <b>Moderate</b> | <b>Low</b> |
|------------------|---------------|------------|-----------------|------------|
| Indel            | AC1           | 1,315      | 926             | 518        |
|                  | AC2           | 228        | 185             | 130        |
|                  | MAF < 1%      | 218        | 171             | 114        |
|                  | 1% < MAF < 5% | 195        | 177             | 117        |
|                  | MAF > 5%      | 299        | 243             | 233        |
|                  | All           | 2,255      | 1,702           | 1,112      |
| SNV              | AC1           | 1,647      | 41,213          | 31,268     |
|                  | AC2           | 236        | 7,981           | 7,462      |
|                  | MAF < 1%      | 244        | 7,671           | 7,484      |
|                  | 1% < MAF < 5% | 233        | 7,448           | 7,996      |
|                  | MAF > 5%      | 310        | 9,863           | 13,326     |
|                  | All           | 2,670      | 74,176          | 67,536     |

**Table S2. Coding mutation distribution according to minor allele frequency and impact on gene product. LoF, loss of function.**
